# Supplementary material
Source: Elsevier journal article supplement (https://www.sciencedirect.com/science/article/pii/S0300893214004655)
Supplement: mmc1 [file mmc1.pdf]

#

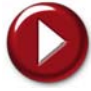

Material suplementario

---

## Estimación del riesgo cardiovascular en España según la guía europea sobre prevención de la enfermedad cardiovascular en la práctica clínica

Antonio Jesús Amor<sup>a</sup>, Luis Masana<sup>b</sup>, Federico Soriguer<sup>c,d</sup>, Albert Goday<sup>e</sup>, Alfonso Calle-Pascual<sup>f</sup>, Sonia Gaztambide<sup>c,g</sup>, Gemma Rojo-Martínez<sup>c,d</sup>, Sergio Valdés<sup>c,d</sup>, Ramón Gomis<sup>a,c</sup>, Emilio Ortega<sup>a,c,\*</sup>, en nombre del grupo de estudio Di@bet.es<sup>◇</sup>

<sup>a</sup>*Servicio de Endocrinología y Nutrición, Hospital Clínic, IDIBAPS, Barcelona, España*

<sup>b</sup>*Unidad de Medicina Vascul ar y Metabolismo, Hospital Universitario Sant Joan de Reus, Universidad Rovira i Virgili, Reus, Tarragona, España*

<sup>c</sup>*Centro de Investigación Biomédica en Red de Diabetes y Enfermedades Metabólicas Asociadas (CIBERDEM), España*

<sup>d</sup>*Servicio de Endocrinología y Nutrición, Hospital Universitario Carlos Haya, Málaga, España*

<sup>e</sup>*Servicio de Endocrinología y Nutrición, Hospital del Mar, Barcelona, España*

<sup>f</sup>*Servicio de Endocrinología y Nutrición, Hospital Universitario San Carlos, Madrid, España*

<sup>g</sup>*Grupo de Investigación de Diabetes, Hospital Universitario de Cruces, UPV-EHU, Baracaldo, Vizcaya, España*

---

#

**Supplementary Material Table 1.**

Concordance of Estimated Cardiovascular Risk Between REGICOR and SCORE in Men Without Diabetes

|       |                       | REGICOR          |                       |                  |                       |
|-------|-----------------------|------------------|-----------------------|------------------|-----------------------|
| SCORE | Total n = 764         | Low<br>(n = 464) | Moderate<br>(n = 193) | High<br>(n = 43) | Very-high<br>(n = 64) |
|       | Low<br>(n = 86)       | 86 (18.5)        | 0 (0)                 | 0 (0)            | 0 (0)                 |
|       | Moderate<br>(n = 523) | 372 (80.2)       | 146 (75.7)            | 5 (11.6)         | 0 (0)                 |
|       | High<br>(n = 90)      | 6 (1.3)          | 47 (24.3)             | 35 (81.4)        | 2 (3.1)               |
|       | Very-high<br>(n = 65) | 0 (0)            | 0 (0)                 | 3 (7)            | 62 (96.9)             |

Data expressed as number (% of concordance between REGICOR vs. SCORE).

Weighted Kappa coefficient and 95%CI 0.44 (0.39-0.48).

**Supplementary Material Table 2.** Concordance of Estimated Cardiovascular Risk Between REGICOR and SCORE in Women Without Diabetes

|       |                       | REGICOR           |                       |                  |                       |
|-------|-----------------------|-------------------|-----------------------|------------------|-----------------------|
| SCORE | Total n=1215          | Low<br>(n = 1025) | Moderate<br>(n = 137) | High<br>(n = 15) | Very-high<br>(n = 38) |
|       | Low<br>(n = 705)      | 703 (68.6)        | 2 (1.5)               | 0 (0)            | 0 (0)                 |
|       | Moderate<br>(n = 438) | 306 (29.8)        | 131 (95.6)            | 1 (6.7)          | 0 (0)                 |
|       | High<br>(n = 33)      | 15 (1.5)          | 4 (2.9)               | 14 (93.3)        | 0 (0)                 |
|       | Very-high<br>(n = 39) | 1 (0.1)           | 0 (0)                 | 0 (0)            | 38 (100)              |

Data expressed as number (% of concordance between REGICOR vs. SCORE).

Weighted Kappa coefficient and 95%CI 0.53 (0.48-0.58)
